# Supplementary material for: The Associations between Screen Time and Sleep Duration, and Body Mass Index (BMI) in under Five-Year-Old Children
Source: Preprints.org preprint supplement (doi:10.20944/preprints201805.0482.v1), 2018-05-31
Supplement: Supplementary file 1 [file supplementary]

## COVER LETTER FOR SUBMISSION OF MANUSCRIPT

Subject: **SUBMISSION OF A MANUSCRIPT FOR EVALUATION**

Dear Editor,

I am enclosing herewith a manuscript entitled “**the associations between screen time and sleep duration, and body mass index (BMI) in under five-year-old children**” for publication in Children.

With the submission of this manuscript I would like to undertake that the above mentioned manuscript has not been published elsewhere, accepted for publication elsewhere or under editorial review for publication elsewhere; and that my Institute’s (University of Social Welfare and Rehabilitation Sciences) representative is fully aware of this submission. I confirm that the submitted manuscript cannot be withdrawn by author without agreement of the journal.

My Research Project was partially sponsored by Child Health Bureau, Ministry of Health and Medical Education of Iran.

Date of submission: 2018/05/28

**Corresponding Author:**

First Name: **Seyed Ali**

Last Name: **Hosseini**

Email: [alihosse@gmail.com](mailto:alihosse@gmail.com)

Address: **Occupational Therapy Departments., University of Social Welfare and Rehabilitation Sciences, Tehran, Iran**

Telephone: **02188364227**

**List of authors, including corresponding author**

| Full name of authors | Email address                                                    | Affiliation                                                                                                                                                                                                                                                                          |
|----------------------|------------------------------------------------------------------|--------------------------------------------------------------------------------------------------------------------------------------------------------------------------------------------------------------------------------------------------------------------------------------|
| Hossein Sourtiji     | <a href="mailto:ot.sourtiji@yahoo.com">ot.sourtiji@yahoo.com</a> | PhD candidate, 1.Occupational Therapy Department, University of Social Welfare and Rehabilitation Science, Tehran, Iran; 2. Department of Occupational Therapy, Isfahan University of Medical sciences, Hezar Jarib Ave, Isfahan, Iran                                               |
| Mehdi Rassafiani     | <a href="mailto:mrassafiani@yahoo.com">mrassafiani@yahoo.com</a> | Associate Professor, 1. Occupational Therapy Department, Faculty of Allied Health Sciences, Kuwait University, Kuwait; 2. Pediatrics Neurorehabilitation Research Center, Department Of Occupational Therapy, University of Social Welfare And Rehabilitation Sciences, Tehran, Iran |

|                         |                                                                        |                                                                                                                                                               |
|-------------------------|------------------------------------------------------------------------|---------------------------------------------------------------------------------------------------------------------------------------------------------------|
| Seyed Ali Hosseini      | <a href="mailto:alihosse@gmail.com">alihosse@gmail.com</a>             | Professor, Social Determinants of Health Research and Occupational Therapy Department, University of Social Welfare and Rehabilitation Sciences, Tehran, Iran |
| Mohammad Esmail Motlagh | <a href="mailto:memotlagh@ajums.ac.ir">memotlagh@ajums.ac.ir</a>       | Professor, Department of Pediatrics, Ahvaz Jundishapur University of Medical Sciences, Ahvaz, Iran                                                            |
| Mehdi Noroozi           | <a href="mailto:noroozimehdi04@gmail.com">noroozimehdi04@gmail.com</a> | Assistant Professor, Substance Abuse and Dependence Research Center, University of Social Welfare and Rehabilitation Sciences, Tehran, Iran                   |
